# Supplementary material for: Increased expression and copy number amplification of LINE-1 and SINE B1 retrotransposable elements in murine mammary carcinoma progression
Source: PubMed Central journal article supplement (PMC3875756; doi:10.18632/oncotarget.1188), 2013-08-09
Supplement: oncotarget-04-1882-s001.pdf [file oncotarget-04-1882-s001.pdf]

# Increased expression and copy number amplification of LINE-1 and SINE B1 retrotransposable elements in murine mammary carcinoma progression – Gualtieri et al

**Table S1. Quantitative criteria used in immunohistochemical and histological analyses.**

| Biomarker expression                                             |                     | Histology           |                                                  |         |
|------------------------------------------------------------------|---------------------|---------------------|--------------------------------------------------|---------|
| Signal intensity (sample vs. control treated with 2ary antibody) | Cell positivity (%) | Severity of lesions | Histological grade                               |         |
| – (same as background)                                           | 1                   | Absent              | Normal                                           |         |
| ± (moderately higher than background)                            | 5                   | ≤ 10%               | Low                                              | Grade 1 |
| + (higher than background)                                       | 10                  | >10% <30%           | Intermediate no infiltrating cells               | Grade 2 |
|                                                                  |                     |                     | Intermediate with infiltrating cells             | Grade 2 |
| ++ (much higher than background)                                 | 20                  | >30% <50%           | High mixed LCSl and DCSl                         | Grade 3 |
|                                                                  |                     |                     | High infiltrating LC and DC                      | Grade 3 |
| +++ (dramatically higher than background)                        | 30                  | ≥50%                | High infiltrating LC and DC with vessel invasion | Grade 3 |
